# Supplementary material
Source: Royal Society of Chemistry journal article supplement (doi:10.1039/d6gc00388e)
Supplement: d6gc00388e1.pdf [file d6gc00388e1.pdf]

**Eco-efficient fractionation of bamboo using a pyruvic acid-based  
deep eutectic solvent: a waste-minimized strategy for comprehensive  
valorization**

Fan Zhang<sup>a,b</sup>, Jianbo Huang<sup>b</sup>, Zeqi Wu<sup>a,b</sup>, Zhenhua Su<sup>b</sup>, Jun Xie<sup>c,\*</sup>, Chuanfu Liu<sup>a</sup>,  
Wu Lan<sup>a,\*</sup>

<sup>a</sup> State Key Laboratory of Pulp and Paper Engineering, South China University of  
Technology, Guangzhou 510640, PR China

<sup>b</sup> China National Pulp and Paper Research Institute Co., Ltd., Beijing 100102, PR  
China

<sup>c</sup> Key Laboratory of Energy Plants Resource and Utilization, Ministry of Agriculture  
and Rural Affairs, Guangdong Engineering Technology Research Center for  
Agricultural and Forestry Biomass, South China Agricultural University, Guangzhou,  
China

\*Corresponding author's Email: [lanwu@scut.edu.cn](mailto:lanwu@scut.edu.cn); [xiejun@scau.edu.cn](mailto:xiejun@scau.edu.cn)

# 1. Experimental section

## 1.1. Characterizations

Thermogravimetric analyzer (TG209F3, Germany) was used to analyze the thermal properties of cellulose-rich residue. At nitrogen atmosphere, each sample was heated from 40 to 800 °C at a rate of 15 °C·min<sup>-1</sup>. Comprehensive pyrolytic index (CPI) was used to evaluate the pyrolytic severity and calculated using the following equation:<sup>1,2</sup>

$$\text{CPI} = \frac{-\text{DTG}_{\text{max}}}{T_{\text{max}}(T_e - T_i)}$$

$T_i$  represents starting temperature of devolatilization;  $T_{\text{max}}$  represents the peak temperature on the DTG curve;  $T_e$  represents end temperature of devolatilization;  $\text{DTG}_{\text{max}}$  represents the maximum degradation rate on the DTG curve.

The kinetic parameters of material pyrolysis within the temperature range of 150-380 °C were determined according to previous research.<sup>3</sup>

$$\frac{d_\alpha}{d_T} = \frac{A}{\beta} \exp\left(-\frac{E}{RT}\right) F(\alpha)$$

where  $\alpha$  represents the conversion rate;  $E$  represents the activation energy;  $A$  represents the pre-exponential;  $\beta$  represents the heating rate;  $T$  represents response temperature;  $F(\alpha)$  represents kinetics equation, and  $R$  represents the gas constant.

Tensile tests on the bio-plastics were performed using an Instron 3300 universal testing machine. The films were precisely cut into rectangular samples measuring approximately 10 × 50 mm<sup>2</sup>. These samples were clamped at both ends and stretched along the longitudinal direction at a constant strain rate of 5 mm/min until fracture occurred. Fourier transform infrared spectroscopy (ATR-FTIR) was conducted using a NICOLET IS50 spectrometer (Thermo Fisher Scientific, USA) with a scanning range of 4000-650 cm<sup>-1</sup> and a resolution of 4 cm<sup>-1</sup>. The UV-visible (UV-vis) spectral analysis of the bio-plastics was conducted with a spectrophotometer (UV-2600, Japan), scanning wavelengths from 200 to 800 nm. The UV-blocking capability of composite films was calculated via the following equation:

$$\text{UV blocking (\%)} = \left(1 - \frac{\int_a^b T(\lambda) d\lambda}{\int_a^b d\lambda}\right) \times 100\%$$

In the equation,  $T(\lambda)$  represents the average spectral transmittance of the bio-plastics, where  $d\lambda$  denotes the bandwidth and  $\lambda$  is the wavelength. The integral limits for calculating overall UV blocking are set as  $a=200$  nm,  $b=400$  nm. When calculating for UVA blocking, the range is 320-400 nm. For UVB blocking, the range is 290-320 nm.

**Table S1.** Pyrolysis parameters and kinetics of bamboo feedstock and pretreated residues.

| Samples              | Pyrolysis parameters |                    |               |                    |                         | Kinetic parameters                                     |                   |                             |       |
|----------------------|----------------------|--------------------|---------------|--------------------|-------------------------|--------------------------------------------------------|-------------------|-----------------------------|-------|
|                      | $T_i$<br>(°C)        | $T_{\max}$<br>(°C) | $T_e$<br>(°C) | Weight<br>loss (%) | $DTG_{\max}$<br>(%/min) | CPI<br>[ $\times 10^{-5}$ (%/min<br>°C <sup>2</sup> )] | $E^a$<br>(kJ/mol) | Log A<br>(s <sup>-1</sup> ) | $R^2$ |
| Bamboo               | 151.86               | 352.14             | 380.42        | 82.44              | -9.49                   | 11.79                                                  | 60.75             | 2.69                        | 0.999 |
| PyA-R <sub>80</sub>  | 156.40               | 344.75             | 371.56        | 88.92              | -20.53                  | 27.68                                                  | 94.3              | 5.15                        | 0.999 |
| PyA-R <sub>100</sub> | 157.66               | 339.48             | 365.71        | 91.52              | -28.85                  | 40.85                                                  | 169.55            | 12.26                       | 0.999 |
| PyA-R <sub>120</sub> | 160.23               | 336.94             | 365.88        | 91.16              | -31.02                  | 44.77                                                  | 211.89            | 16.07                       | 0.998 |
| PyA-R <sub>140</sub> | 163.32               | 337.59             | 366.99        | 92.01              | -32.55                  | 47.34                                                  | 240.13            | 18.54                       | 0.999 |
| AA-R <sub>140</sub>  | 158.29               | 350.27             | 375.88        | 90.95              | -25.68                  | 33.69                                                  | 149.28            | 10.23                       | 0.998 |
| PA-R <sub>140</sub>  | 164.19               | 345.80             | 373.22        | 89.15              | -23.51                  | 32.53                                                  | 118.75            | 7.62                        | 0.998 |

$T_i$ : Initial temperature of devolatilization;

$T_{\max}$ : The peak temperature on the DTG curve;

$T_e$ : End temperature of devolatilization;

$DTG_{\max}$ : The maximum weight loss rate;

CPI: Comprehensive pyrolytic index;

<sup>a</sup> Temperature range between 150 °C and 380 °C.

**Table S2.** Semi-quantitative evaluation of PMI and E-factor.

| Parameter         | Scenario A | Scenario B |
|-------------------|------------|------------|
| Total Input Mass: | 1120.9 g   | 1120.9 g   |
| Recovered ethanol | 75.0 g     | 75.0 g     |
| Desired Products  | 1.35 g     | 42.0 g     |
| Total Waste*      | 1044.55 g  | 1003.9 g   |
| PMI               | 830.3      | 26.69      |
| E-factor          | 773.7      | 23.90      |

Scenario A (Traditional strategy): The xylose-enriched DES filtrate is discarded as waste.

Scenario B (Our proposed strategy): The xylose-enriched DES filtrate is upcycled as functional additives for plastic films.

\*: Total Waste = Total Input-Recovered ethanol-Desired Products.

**Table S3.** Chemical compositions and their concentrations in the waste-DES filtrate.

| Chemical compositions | Concentrations (mg·L <sup>-1</sup> ) |
|-----------------------|--------------------------------------|
| Glucose               | 126.5                                |
| Xylose                | 212.9                                |
| Arabinose             | 13.5                                 |
| HMF                   | 21.5                                 |
| Soluble lignin        | 65.2                                 |
| Pyruvic acid*         | 31.6×10 <sup>3</sup>                 |
| Choline chloride*     | 8.36×10 <sup>3</sup>                 |

\*: Estimated based on mass balance.

**Table S4.** The comparative analysis of the thermochemical properties

| Method                                     | DTG <sub>max</sub><br>(%/min) | CPI<br>[ $\times 10^{-5}$ (%/min<br>$^{\circ}\text{C}^2$ )] | E<br>(kJ/mol) | Reference |
|--------------------------------------------|-------------------------------|-------------------------------------------------------------|---------------|-----------|
| Microwave assisted organosolv pretreatment | -39.38                        | -                                                           | 291.6         | 4         |
| Benzenesulfonic acid pretreatment          | -8.32                         | -                                                           | 103.9         | 5         |
| Acid washing pretreatment                  | -20.9                         | 41.8                                                        | 140.9         | 2         |
| Torrefaction pretreatment                  | -22.0~-26.6                   | 19.9~48.3                                                   | -             | 1         |
| Electro-assisted seawater pretreatment     | -8.3~-10.7                    | 6.9~10.2                                                    | 71.5~119.8    | 6         |
| PyA-DES pretreatment                       | -20.5~-32.6                   | 27.7~47.3                                                   | 94.3~240.1    | This work |

**Table S5.** The summary of lignocellulose fractionation with different DES systems

| Feedstock              | DES                                    | Pretreatment condition | Delignification efficiency (%) | Cost*          | Ref.      |
|------------------------|----------------------------------------|------------------------|--------------------------------|----------------|-----------|
| Poplar                 | ZnCl <sub>2</sub> /Lactic acid         | 120 °C, 3 h            | 96.3                           | ~\$1.1–1.2/kg  | 7         |
| Reed straw             | BTEAC/Formic acid                      | 130 °C, 3 h            | 78.1                           | ~\$2.5–4.4/kg  | 8         |
| Boehmeria nivea stalks | Betaine/Glyoxylic acid                 | 130 °C, 2 h            | 81.9                           | ~\$2.1–3.0/kg  | 9         |
| Moso bamboo            | Betaine/Levulinic acid                 | 80 °C, 2 h             | 11.7                           | ~\$3.3–4.1/kg  | 10        |
| Eucalyptus             | ChCl/Vanillin/FeCl <sub>3</sub>        | 135 °C, 2 h            | 97.1                           | ~\$10.4/kg     | 11        |
| Corn straw             | ChCl/3-(4-hydroxyphenyl)propionic acid | 160°C, 4h              | 58                             | ~\$22–55/kg    | 12        |
| Switchgrass            | ChCl/p-Coumaric acid                   | 160°C, 3h              | 60.8                           | ~\$8.4–16.6/kg | 13        |
| Poplar                 | ChCl/p-Hydroxybenzaldehyde             | 160°C, 3h              | 30.7                           | ~\$4.0–6.7/kg  | 14        |
| Bamboo                 | ChCl/Pyruvic acid                      | 100°C, 1h              | 98.12                          | ~\$6.5–8.1/kg  | This work |

\*: The estimated DES costs were calculated from the weighted prices of the corresponding HBA and HBD components based on their molar ratios.

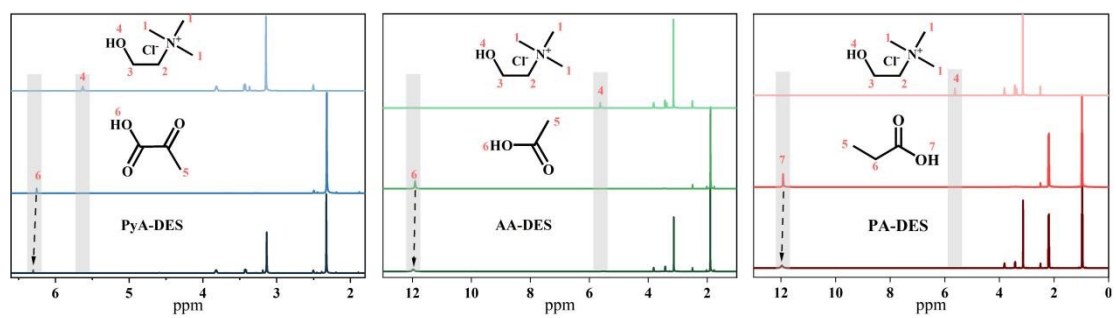

Fig. S1.  $^1\text{H}$  NMR spectra of various DES systems (PyA-DES, AA-DES, and PA-DES).

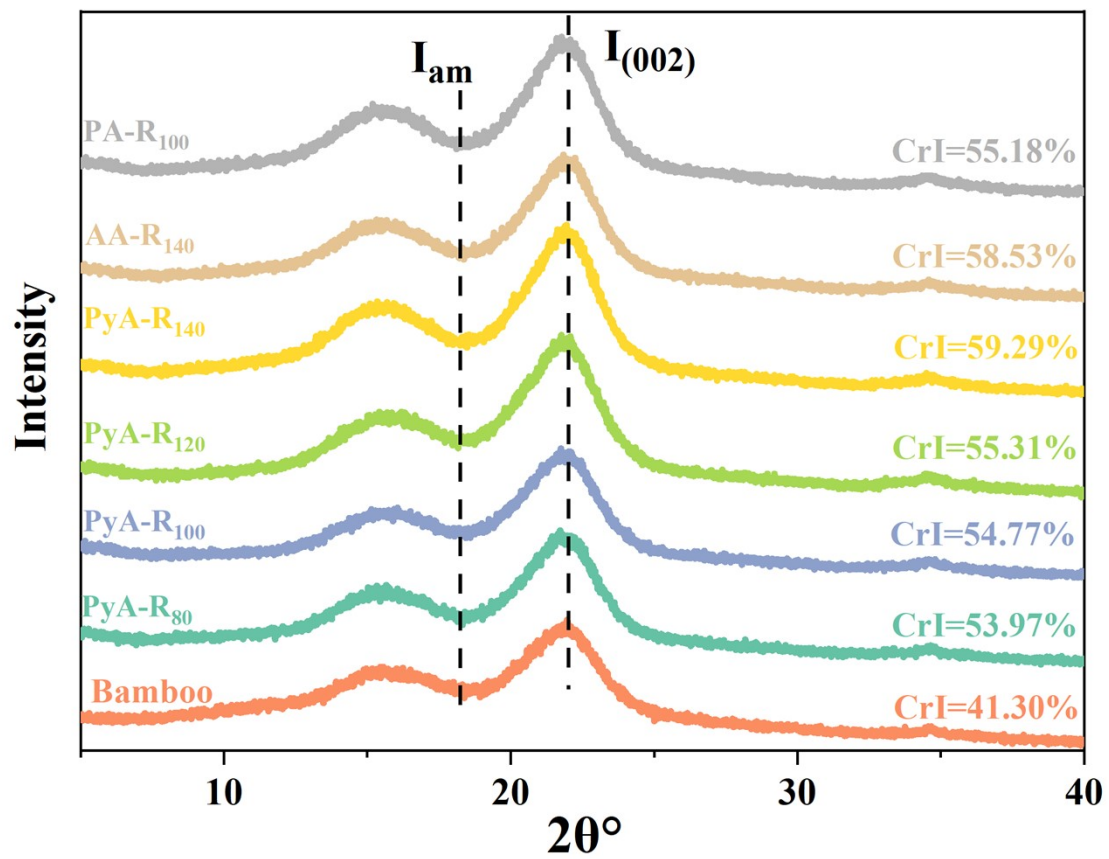

Fig. S2. XRD spectra of bamboo feedstock and pretreated residues.

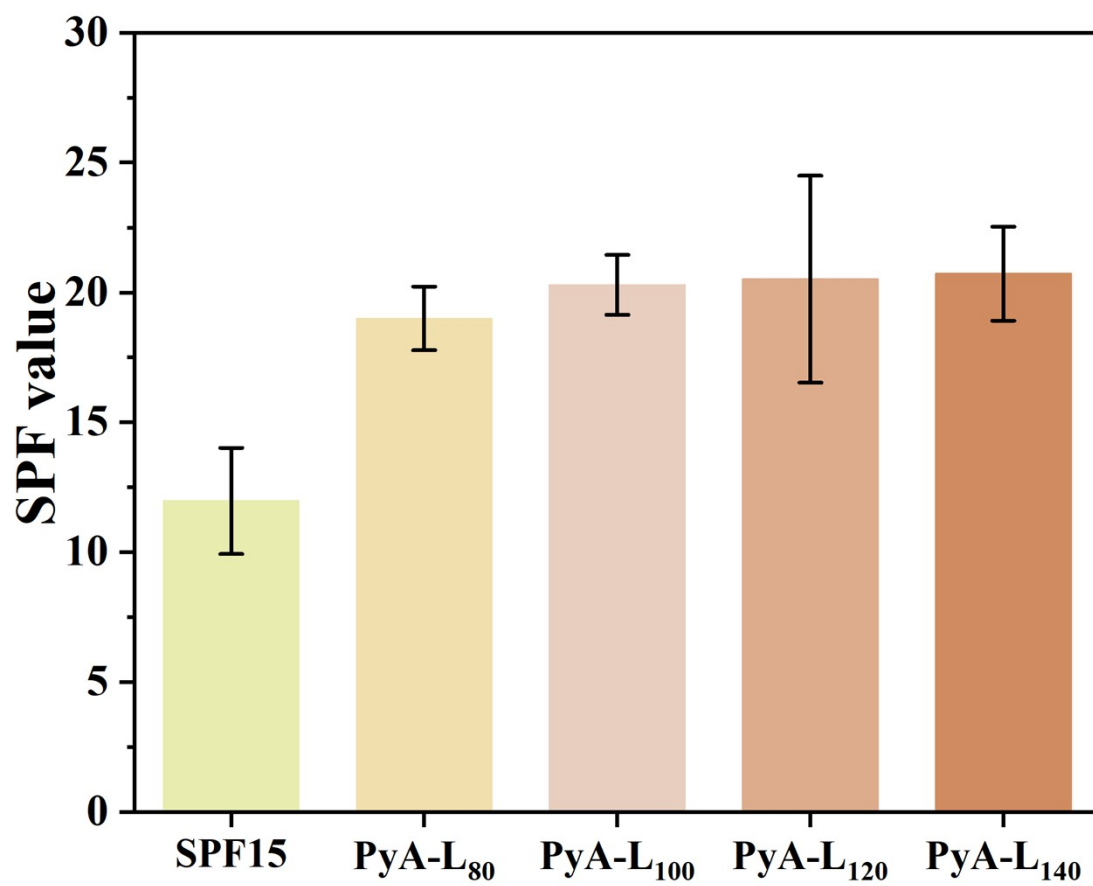

Fig. S3. The SPF values of lignin-based sunscreens from various lignin fractions.

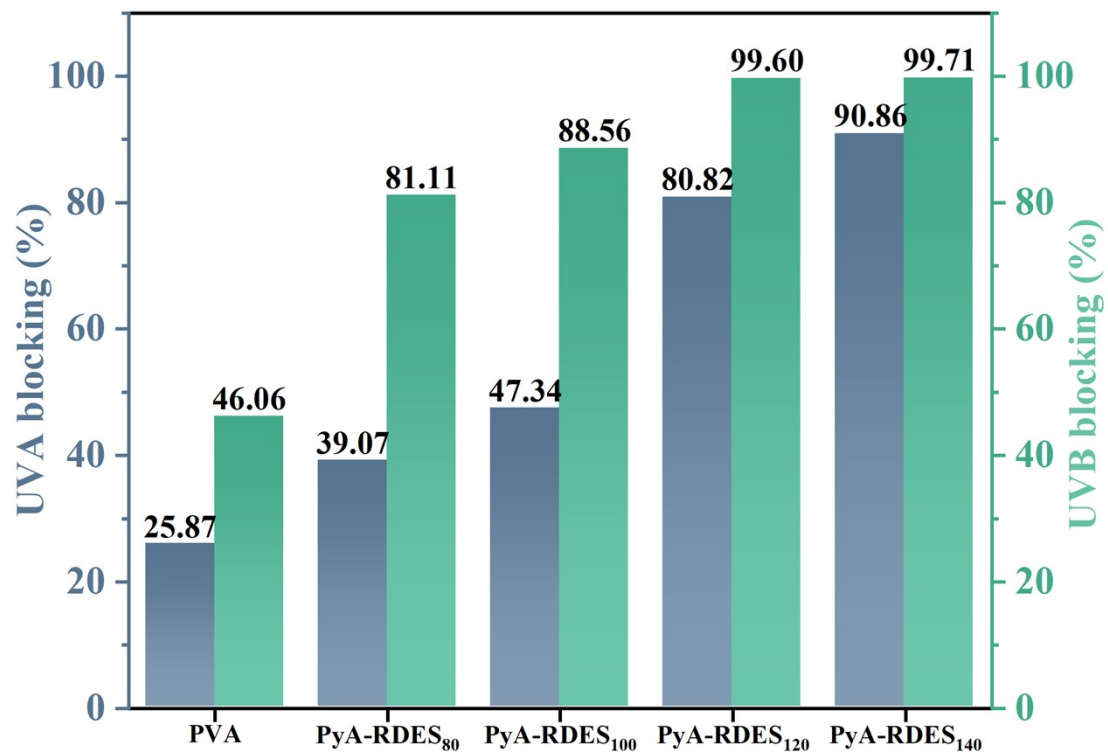

Fig. S4. UV blocking of bio-plastic films.

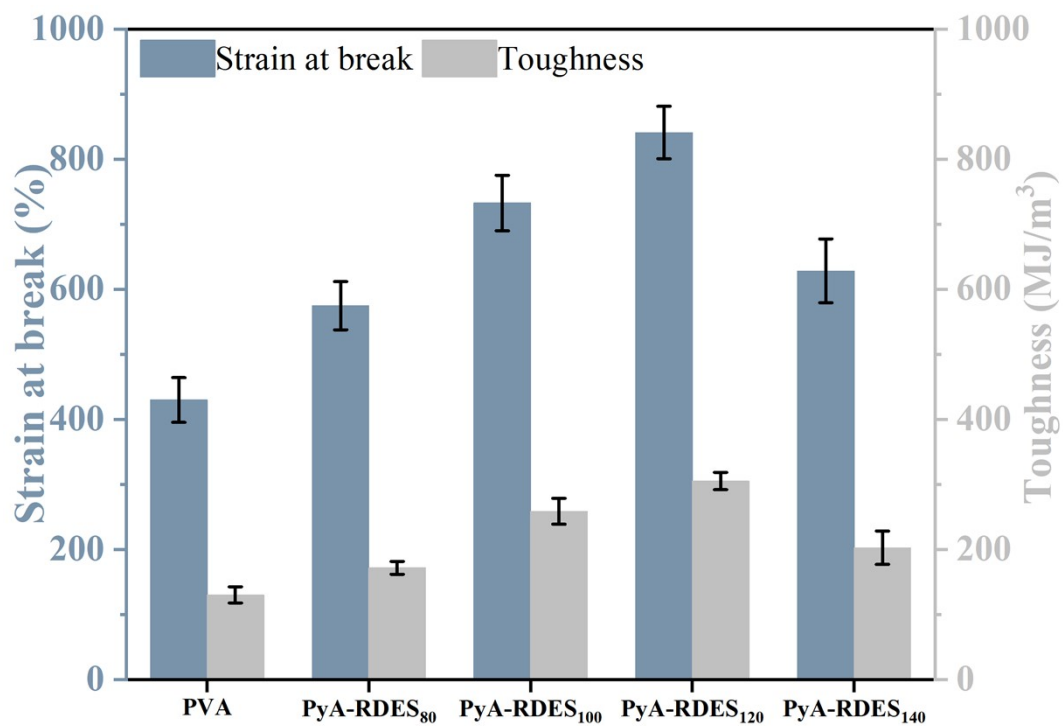

Fig. S5. Elongation at break and toughness of bio-plastic films.

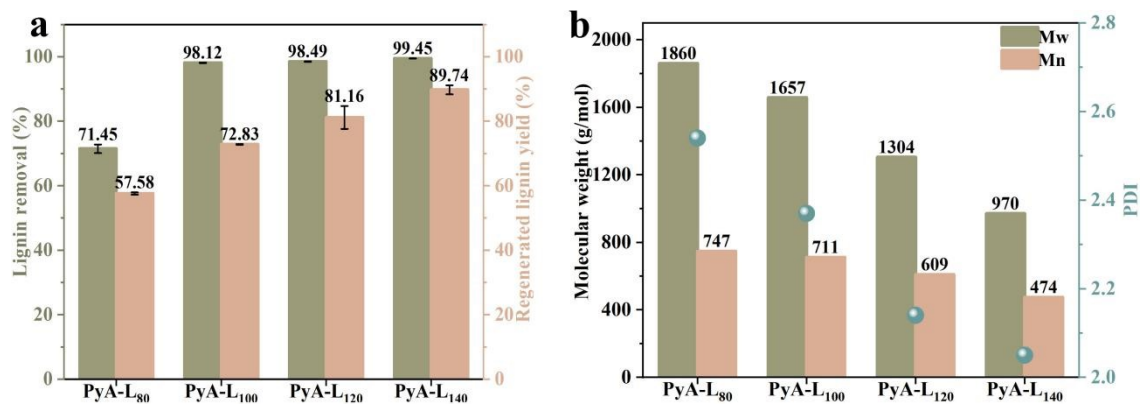

Fig. S6. (a) The lignin removal and the recovery yield of regenerated lignin; (b) molecular weight and polydispersity index of regenerated lignin.

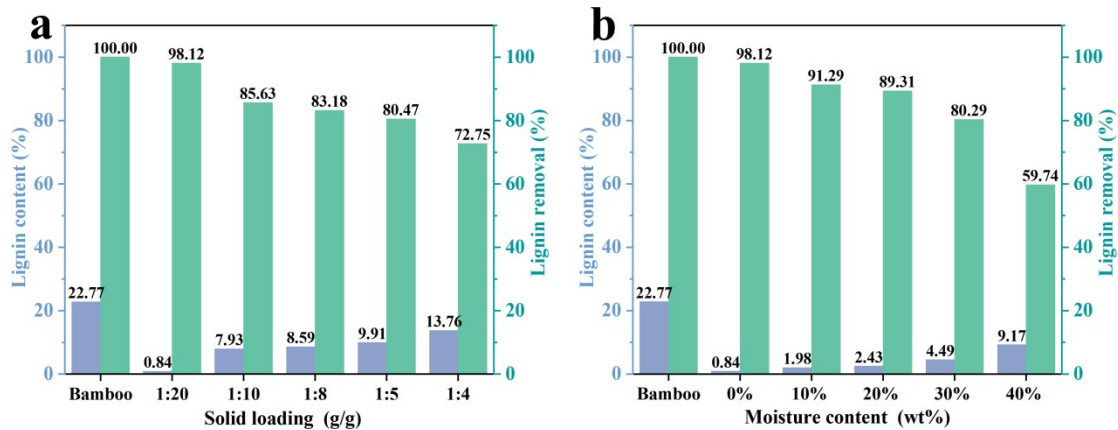

Fig. S7. Effect of solid loading (a) and moisture content (b) on the lignin content and delignification efficiency during PyA-DES pretreatment.

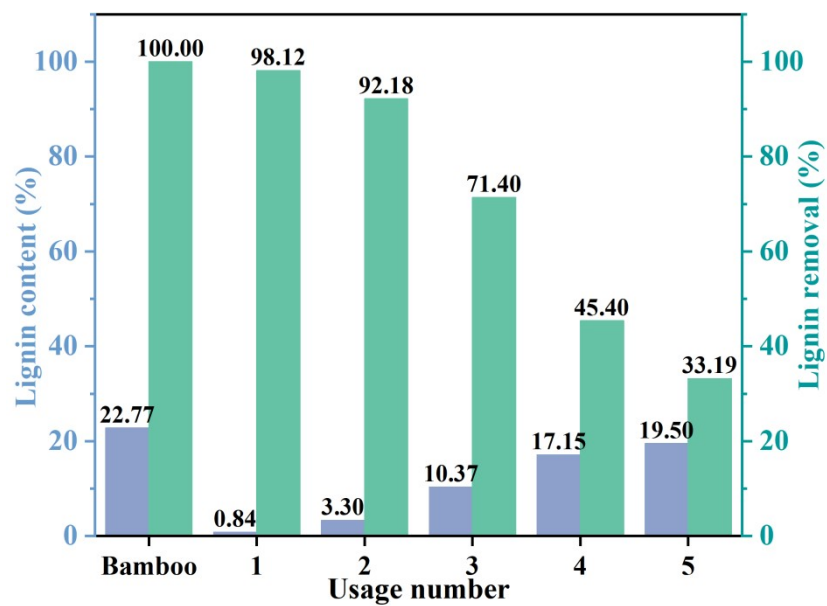

Fig. S8. Effect of usage number on the lignin content and lignin removal of bamboo by PyA-DES pretreatment.

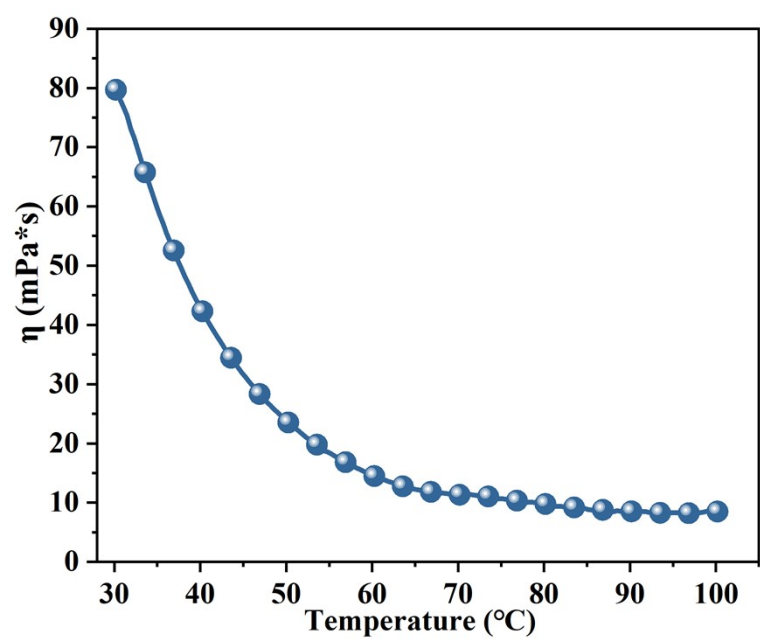

Fig. S9. Effect of temperature on the viscosity of PyA-DES.

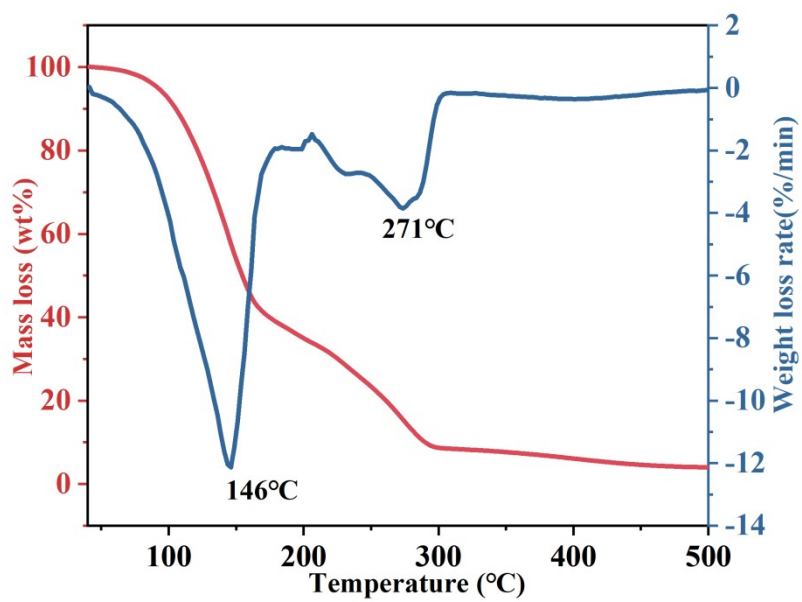

Fig. S10. The TGA analysis of PyA-DES.

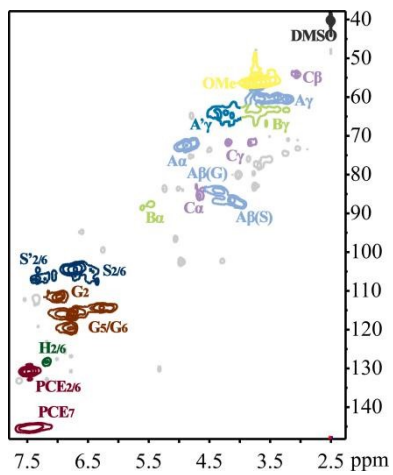

Fig. S11. The 2D HSQC NMR spectra of MWL from untreated bamboo.

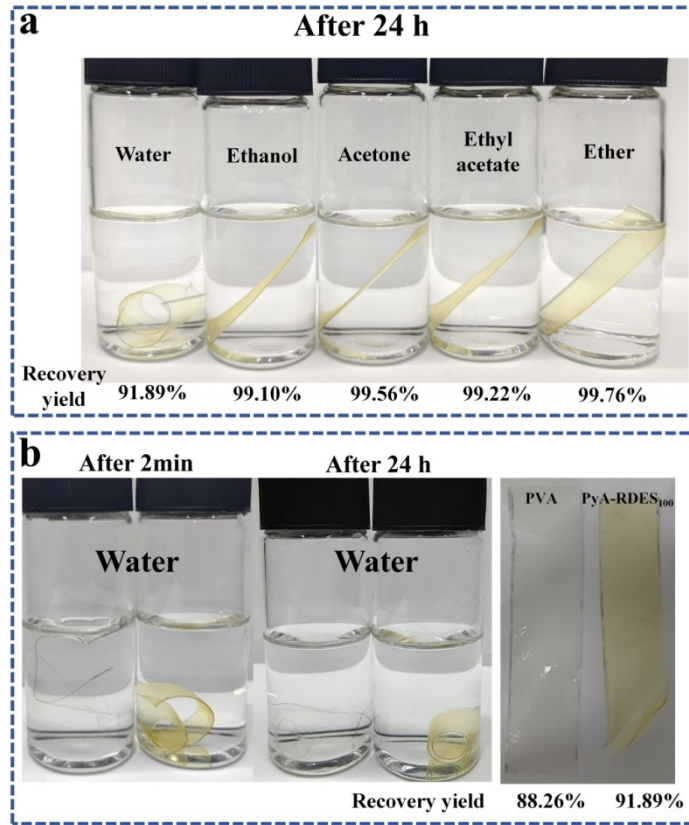

Fig. S12. Optical photos of bio-plastic film soaked in different solvents for 24 h.

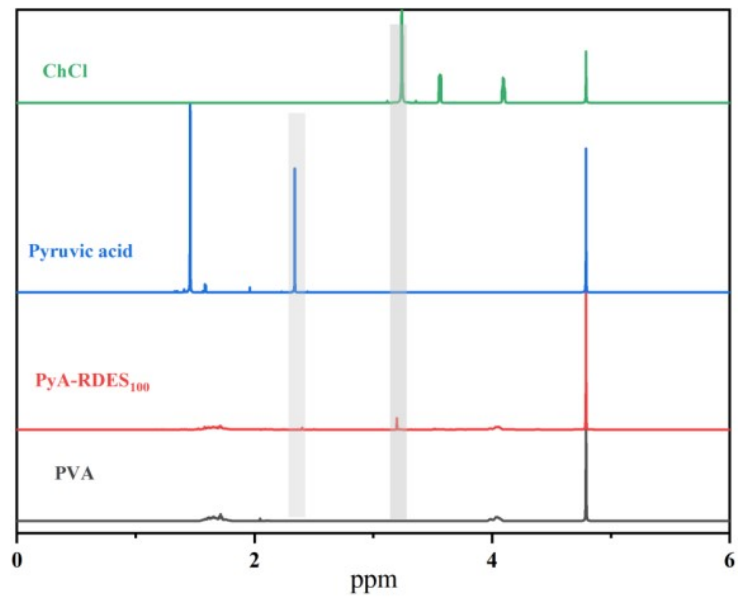

Fig. S13. <sup>1</sup>H NMR spectrum.

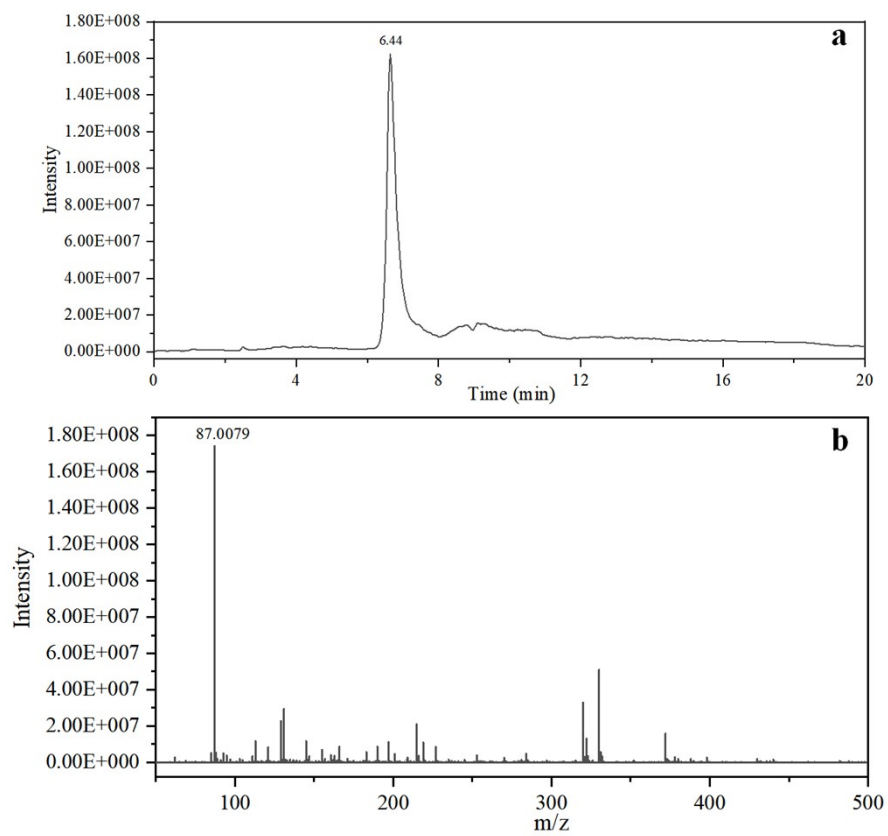

Fig. S14.(a) Negative ion total ion current diagram; (b) primary mass spectrum diagram.

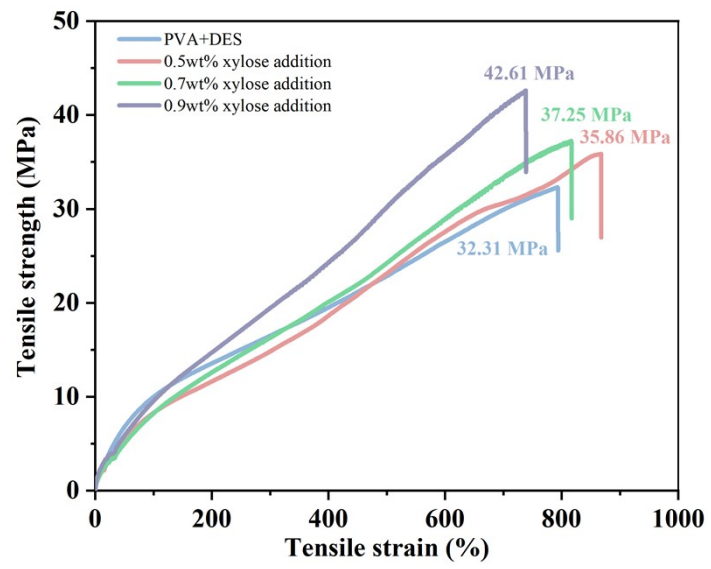

Fig. S15. Tensile stress-strain curves of PVA films.

## References

1. L. Li, Y. Huang, D. Zhang, A. Zheng, Z. Zhao, M. Xia and H. Li, *Acs Sustain Chem Eng*, 2018, **6**, 6008-6017.
2. S. Xing, H. Yuan, Huhetaoli, Y. Qi, P. Lv, Z. Yuan and Y. Chen, *Energy*, 2016, **114**, 634-646.
3. Y. Sun, Z. He, R. Tu, Y. Wu, E. Jiang and X. Xu, *Bioresource Technol*, 2019, **286**, 121390.
4. Z. Wang, Q. Wang, X. Yang, S. Xia, A. Zheng, K. Zeng, Z. Zhao, H. Li, S. Sobek and S. Werle, *Energ Fuel*, 2021, **35**, 3186-3196.
5. H. Yu, F. Zhang, L. Li, H. Wang, Z. Jia, Y. Sun, E. Jiang and X. Xu, *Bioresource Technol*, 2022, **363**, 127876.
6. H. Yu, F. Zhang, L. Li, H. Wang, Y. Sun, E. Jiang and X. Xu, *Bioresource Technol*, 2022, **346**, 126478.
7. Y. Bai, X. Zhang, Z. Wang, T. Zheng and J. Yao, *Bioresource Technol*, 2022, **347**, 126723.
8. Z. Zhang, J. Xu, J. Xie, S. Zhu, B. Wang, J. Li and K. Chen, *Carbohydr Polym*, 2022, **290**, 119472.
9. Y. Fan, H. Ji, X. Ji, Z. Tian and J. Chen, *Chem Eng J*, 2024, **499**, 156482.
10. Z. Ling, Z. Guo, C. Huang, L. Yao and F. Xu, *Bioresource Technol*, 2020, **305**, 123025.
11. F. Zhang, J. Huang, Z. Wu, Z. Su, C. Liu and W. Lan, *Int J Biol Macromol*, 2025, **308**, 142053.
12. C. Fu, S. Wang and G. Song, *Ind Crop Prod*, 2024, **212**, 118380.
13. K. H. Kim, T. Dutta, J. Sun, B. Simmons and S. Singh, *Green Chem*, 2018, **20**, 809-815.
14. Y. Wang, X. Meng, K. Jeong, S. Li, G. Leem, K. H. Kim, Y. Pu, A. J. Ragauskas and C. G. Yoo, *Acs Sustain Chem Eng*, 2020, **8**, 12542-12553.
